# Supplementary figures and images for: Mutant JAK3 phosphoproteomic profiling predicts synergism between JAK3 inhibitors and MEK/BCL2 inhibitors for the treatment of T-cell acute lymphoblastic leukemia
Source: Springer Nature journal article supplement (doi:10.1038/leu.2017.276), 2017-08-30

A

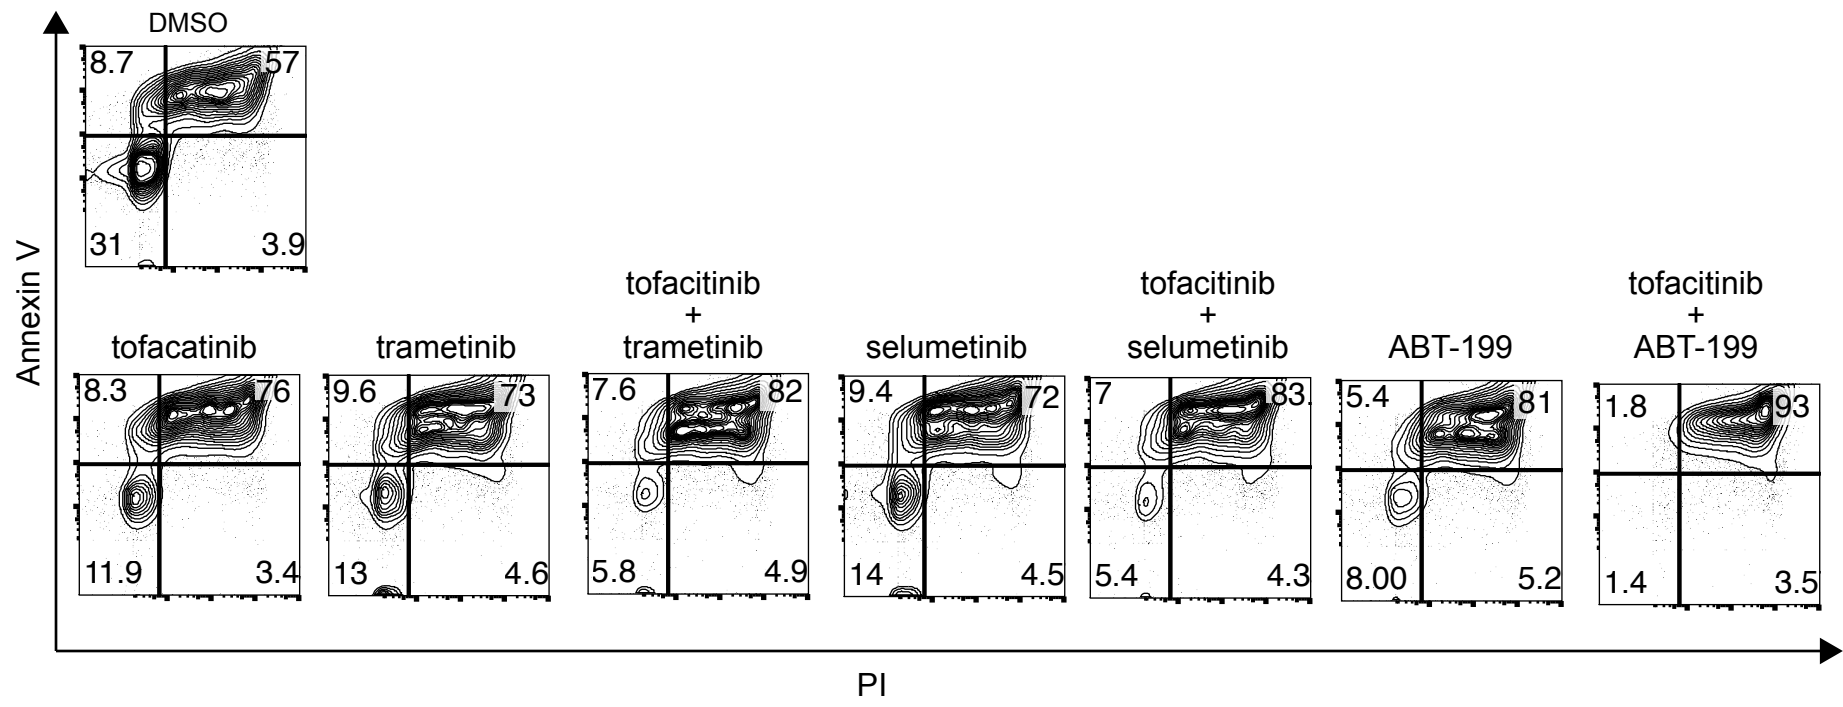

B

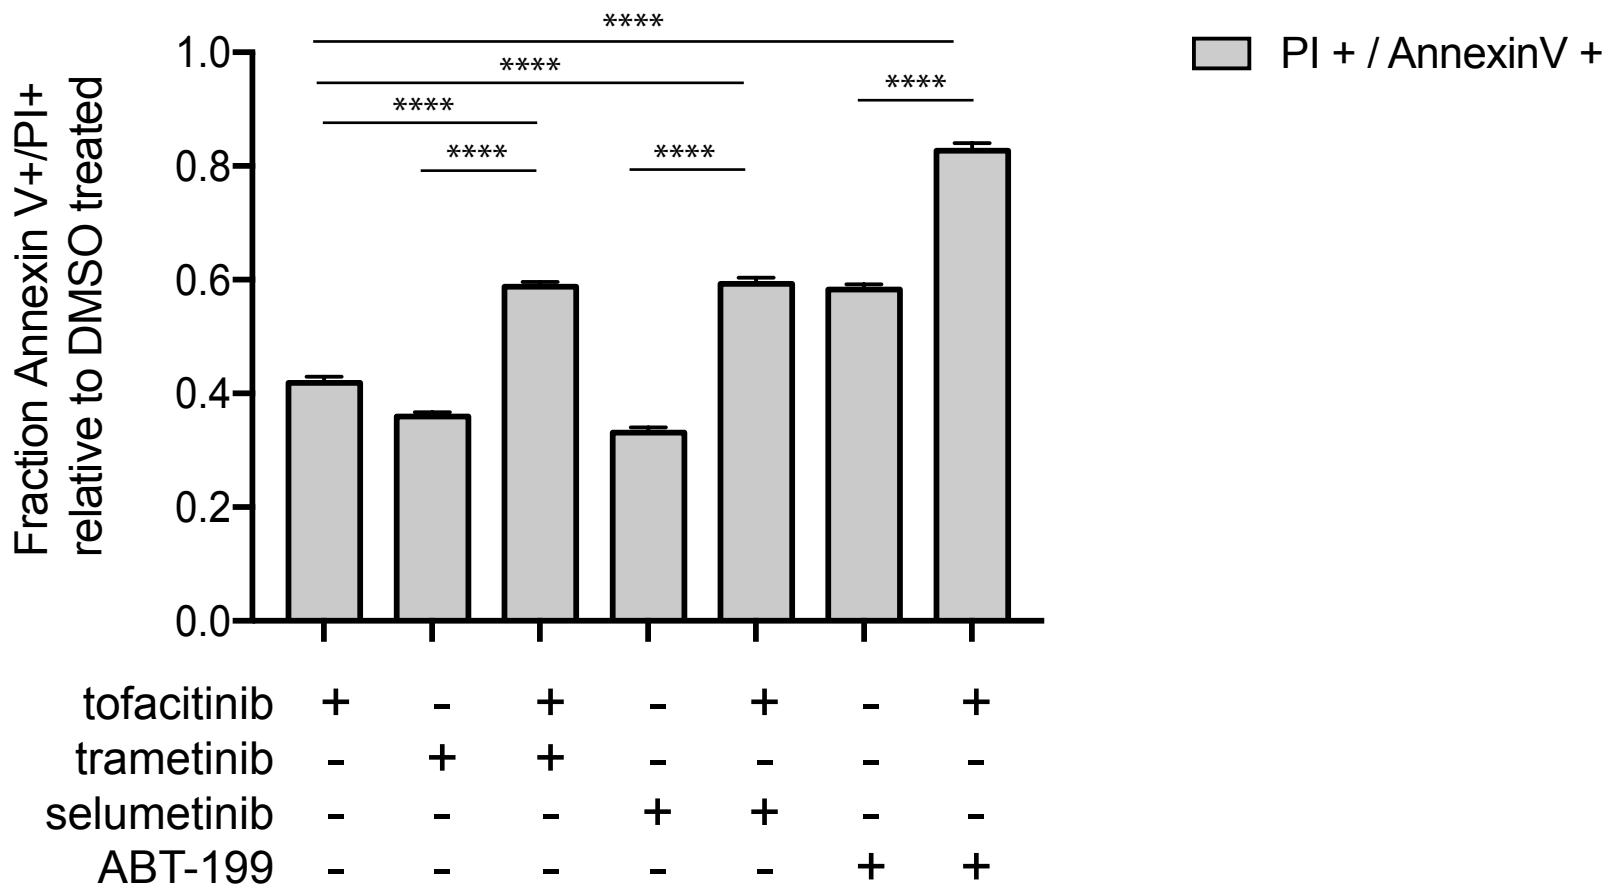

Supplement: 41375_2018_BFleu2017276_MOESM85_ESM.pdf [file 41375_2018_BFleu2017276_MOESM85_ESM.pdf]
